# Supplementary material for: Homologue-paired liquids as special non-ionic deep eutectic solvents for efficient absorption of SO2
Source: Royal Society of Chemistry journal article supplement (doi:10.1039/d2cc03050k), 2022-01-01
Supplement: d2cc03050k1.pdf [file d2cc03050k1.pdf]

## Electronic Supplementary Information

### Homologue-paired liquids as special non-ionic deep eutectic solvents for efficient absorption of SO<sub>2</sub>

Hangzhi Wu,<sup>a, b</sup> Wenjie Xiong,<sup>b</sup> Shuyue Wen,<sup>b</sup> Xiaomin Zhang,<sup>b, c\*</sup> Shule Zhang<sup>a\*</sup>

<sup>a</sup> School of Chemistry and Chemical Engineering, Nanjing University of Science and Technology, Nanjing 210094, PR China

<sup>b</sup> Key Laboratory of Mesoscopic Chemistry of MOE, School of Chemistry and Chemical Engineering, Nanjing University, Nanjing 210023, P.R. China.

<sup>c</sup> Yuxiu Postdoctoral Institute, Nanjing University, Nanjing 210023, P. R. China.

Email: xmzhang@nju.edu.cn; shulezhang@163.com;

#### General Information

N<sub>2</sub> (99.99 mol%) and SO<sub>2</sub> (99.9 mol%) were provided by Jiangsu Tianhong Chemical Co., Ltd. Acetamide (99 wt%), 1,3-dimethyl-2-imidazolidinone (99 wt%), and tetramethylurea (99 wt%) were purchased from Aladdin Reagents (Shanghai) Co., Ltd. Imidazole (99 wt%) was obtained from Sinopharm Chemical Reagent Co., Ltd. 2-Pyrrolidinone (98 wt%) and 2-imidazolidone (98 wt%) were purchased from Saen Chemical Technology (Shanghai) Co., Ltd. N-methyl-2-pyrrolidinone (99 wt%) and 1-Ethylimidazole (99 wt%) were provided by Shanghai Adamas Reagents Co., Ltd. N-methylacetamide (> 99 wt%) was obtained from Meryer (Shanghai) Chemical Technology Co. Ltd. N, N'-Dimethylurea was purchased from Nine-Dinn Chemistry (Shanghai) Co., Ltd.

The density were determined using an Anton Paar DMA 5000 densiometer with a precision of 0.00001 g·cm<sup>-3</sup>, which was calibrated using distilled water at desired

temperature. Viscosity was measured on a Brookfield DV2TLV viscometer equipped with a spindle CPA-41Z (viscosity ranges from 0.58 to 11510 mPa·s). The rotational speed (N) of the spindle ranges from 0.1 to 200 rpm and the shear rate of the spindle is  $2.0\text{N s}^{-1}$ . The uncertainty of the viscometer is  $\pm 1\%$  in relation to the full scale. Thermal gravity (TG) traces were recorded on a PerkinElmer Pyris 1 TGA from room temperature to 573 K with a scanning rate of  $10\text{ K}\cdot\text{min}^{-1}$  under  $\text{N}_2$  atmosphere. Fourier Transform Infrared (FTIR) spectra were obtained on a Nicolet iS50 infrared spectrometer. The Bruker DPX 400 MHz spectrometer was used to conduct the Nuclear Magnetic Resonance (NMR) characterization with  $\text{d}_6$ -DMSO as solvent.

### **The verification of the formation of hydrogen bonds between HBD and HBA by gaussian calculation**

To prove the formation of hydrogen bonds between HBD and HBA, the optimized structures of Eim-Eim, Im-Im, and Eim-Im (1:1) are obtained at B3LYP/ 6-311g(d,p) level by Gaussian calculations based on the density functional theory, and so does it for NMP-2-Pyr system (**Fig. S1–S6**). The enthalpy change and Gibbs free energy change of the mixing process are calculated using **Equations S1** and **S2**. It is found that the enthalpy changes of NMP-2-Pyr and Eim-Im systems are  $-10.1$  and  $-26.1\text{ kJ}\cdot\text{mol}^{-1}$ , respectively, indicating an exothermic mixing process. The free energy changes of the two systems are  $-12.2$  and  $-26.9\text{ kJ}\cdot\text{mol}^{-1}$ , respectively, demonstrating a spontaneous mixing behavior and also the formation of hydrogen bonds between the homologues.

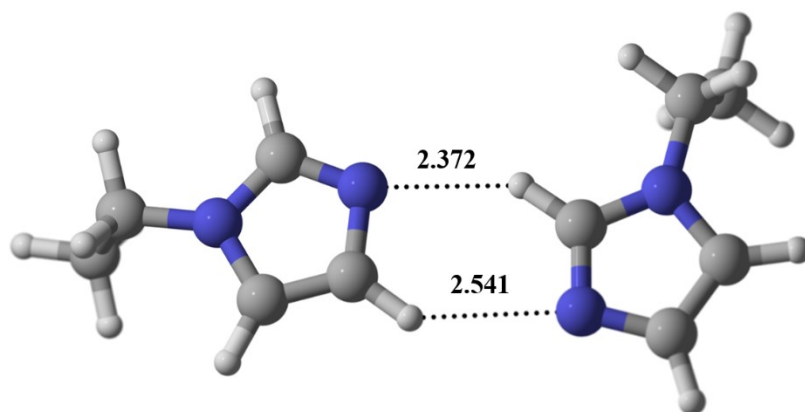

**Fig. S1** Optimized structure of Eim-Eim obtained by B3LYP/ 6-311g(d,p).

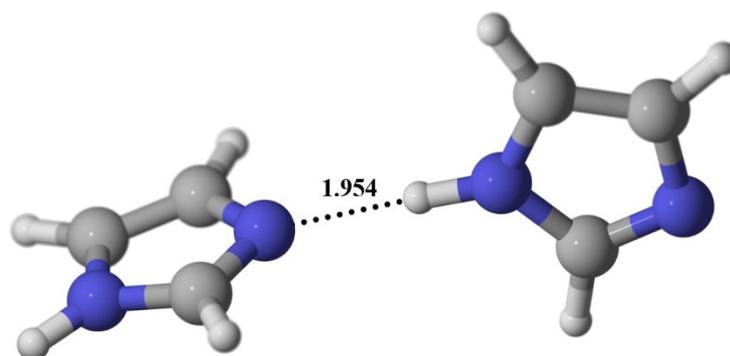

**Fig. S2** Optimized structure of Im-Im obtained by B3LYP/ 6-311g(d,p).

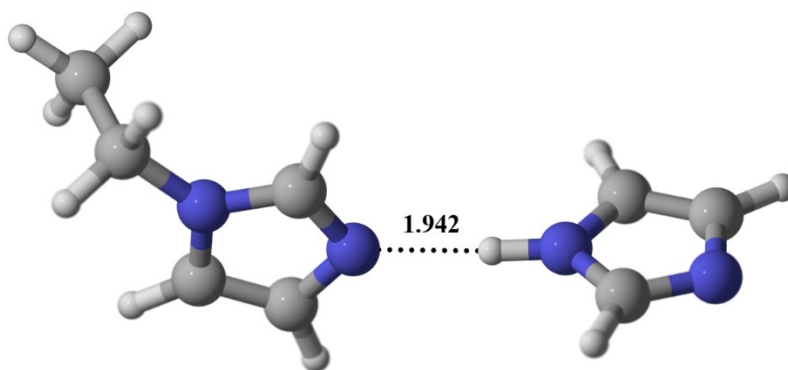

**Fig. S3** Optimized structure of Eim-Im obtained by B3LYP/ 6-311g(d,p).

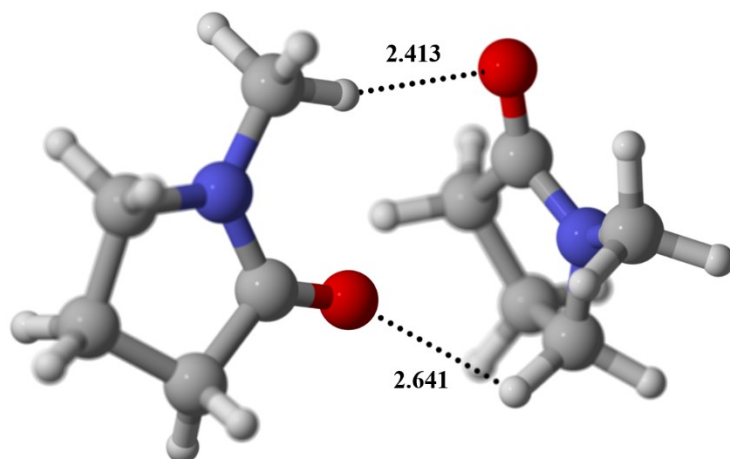

**Fig. S4** Optimized structure of NMP-NMP obtained by B3LYP/ 6-311g(d,p).

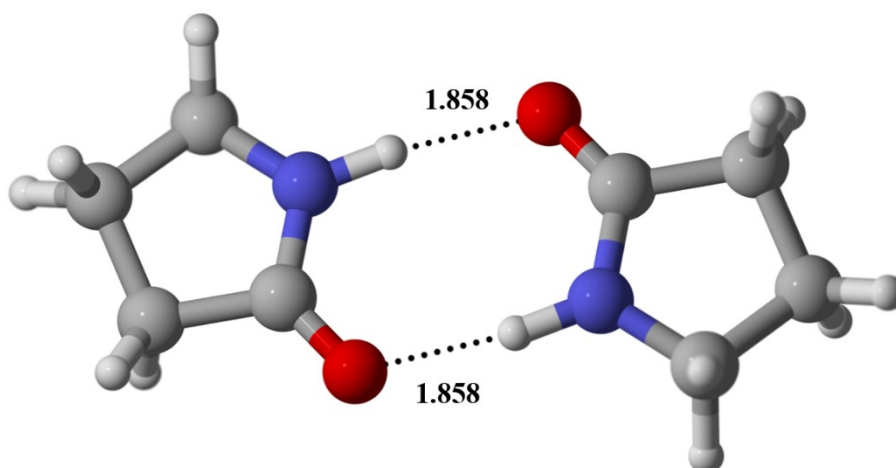

**Fig. S5** Optimized structure of 2-Pyr-2-Pyr obtained by B3LYP/ 6-311g(d,p).

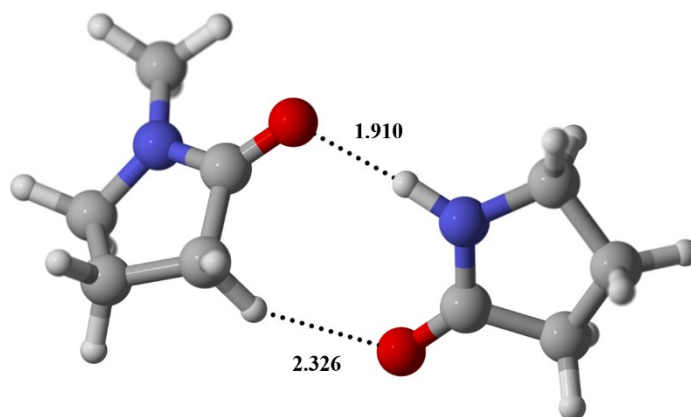

**Fig. S6** Optimized structure of NMP-2-Pyr obtained by B3LYP/ 6-311g(d,p).

## Calculation of enthalpy changes and Gibbs free energy change of mixing process

$$\Delta H_{mix} = 2H_{A-B} - H_{A-A} - H_{B-B} \quad (S1)$$

Where  $\Delta H_{mix}$  represents the enthalpy change of mixing process,  $H_{A-B}$ ,  $H_{A-A}$ , and  $H_{B-B}$  denote the enthalpy of A-B complex, A-A complex, and B-B complex, respectively.

$$\Delta G_{mix} = 2G_{A-B} - G_{A-A} - G_{B-B} \quad (S2)$$

Where  $\Delta G_{mix}$  represents the enthalpy change of mixing process,  $G_{A-B}$ ,  $G_{A-A}$ , and  $G_{B-B}$  denote the Gibbs free energy change of A-B complex, A-A complex, and B-B complex, respectively.

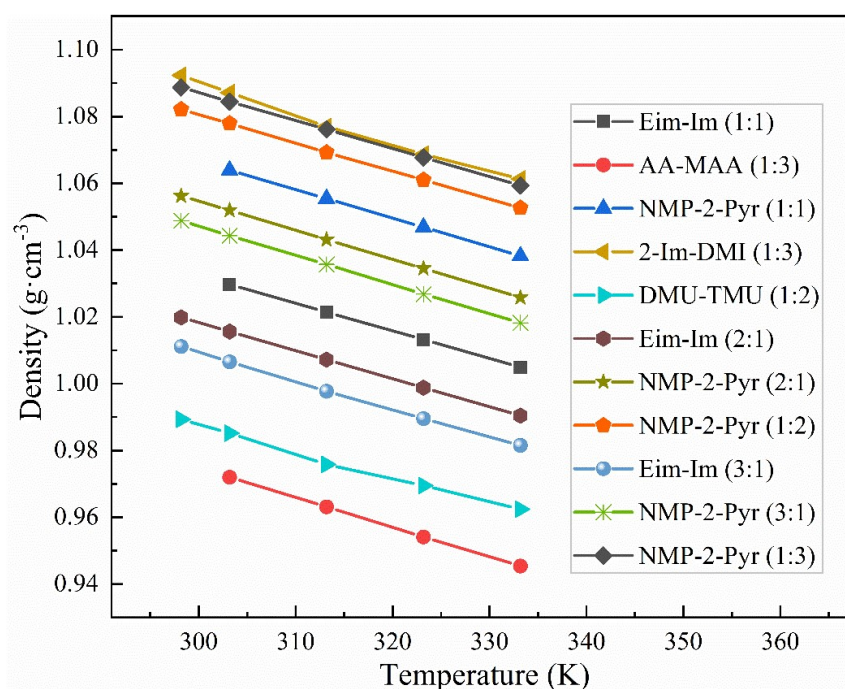

**Fig. S7** Density of HPLs as a function of temperature.

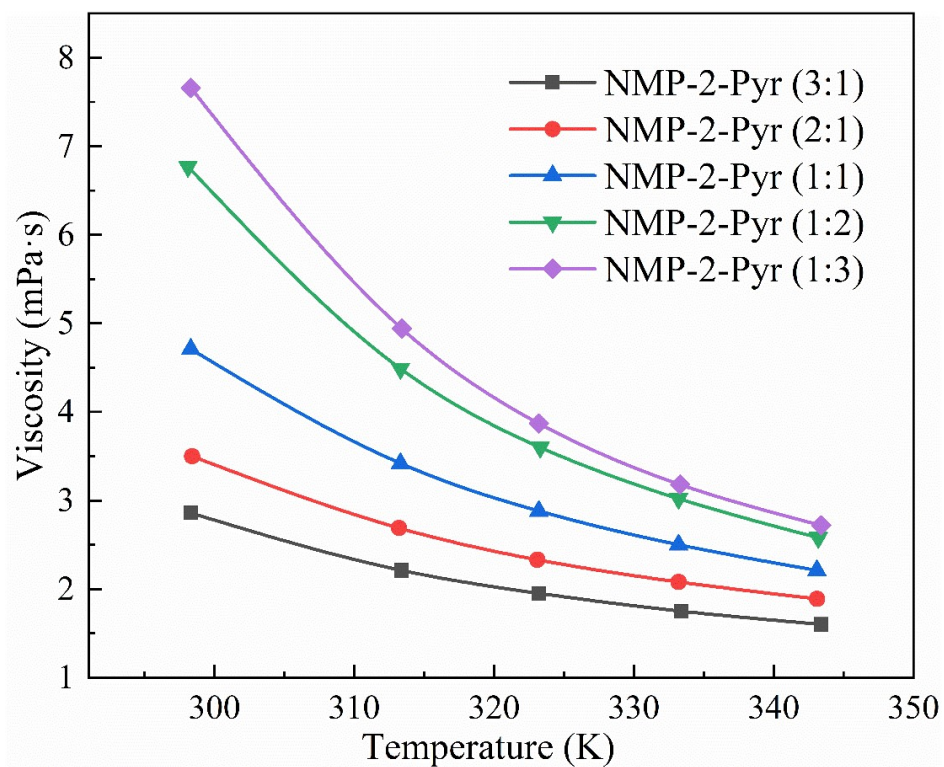

**Fig. S8** Viscosity of NMP-2-Pyr systems as a function of temperature.

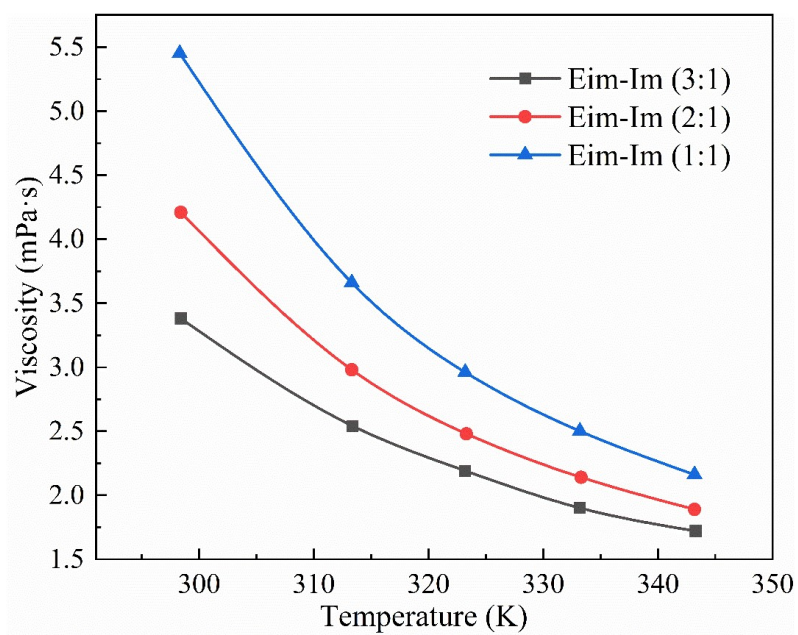

**Fig. S9** Viscosity of Eim-Im systems as a function of temperature.

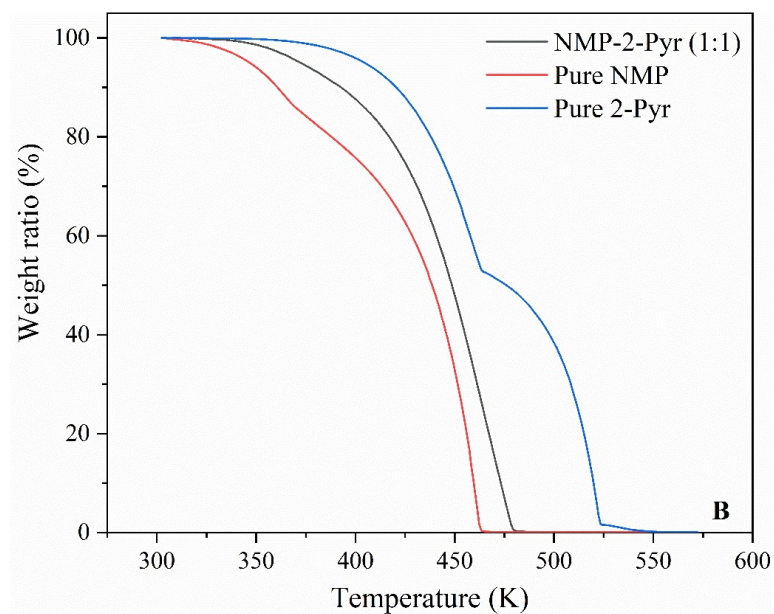

**Fig. S10** The TGA curves of pure NMP, pure 2-Pyr, and NMP-2-Pyr (1:1).

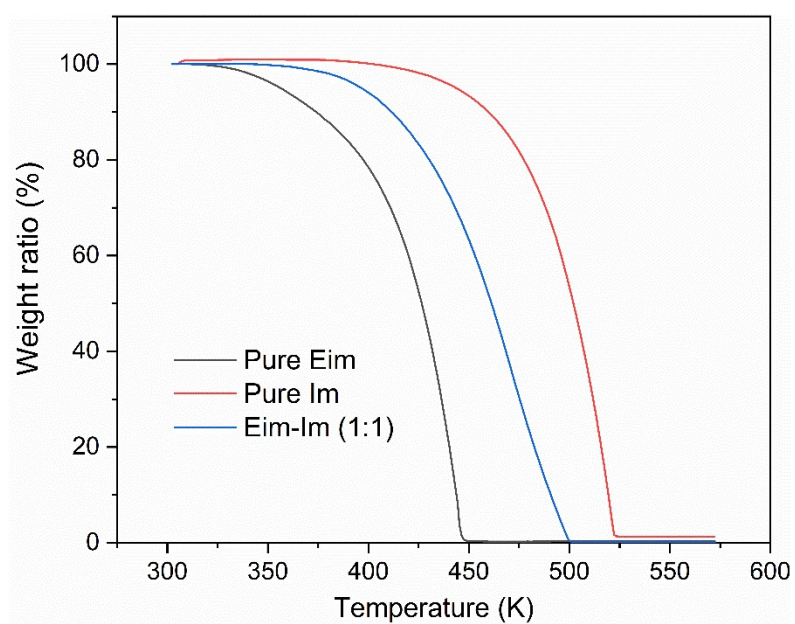

**Fig. S11** The TGA curves of pure Eim, pure Im, and Eim-Im (1:1).

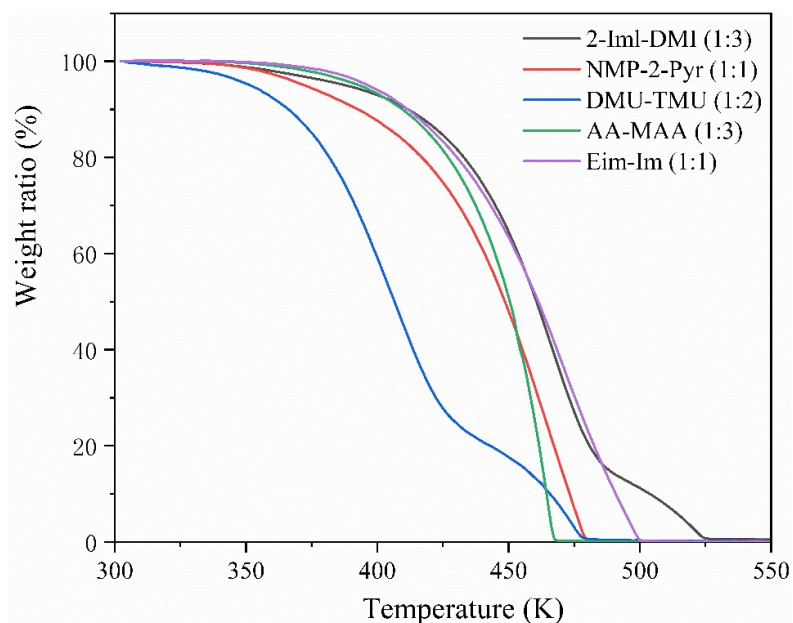

**Fig. S12** The TGA curves of five typical HPLs.

**Table S1.** A summary of boiling and melting points of components, and melting points of five typical HPLs

| Name            | Chemical structures |     | Boiling point (K) |     | Melting point (K) |     | Melting point of HPL (K) |
|-----------------|---------------------|-----|-------------------|-----|-------------------|-----|--------------------------|
|                 | HBA                 | HBD | HBA               | HBD | HBA               | HBD |                          |
| Eim-Im (1:1)    |                     |     | 499               | 530 | NA                | 363 | 178                      |
| NMP-2-Pyr (1:1) |                     |     | 475               | 518 | 249               | 298 | NA                       |



|                  |                                                                                   |                                                                                   |     |                  |     |     |         |
|------------------|-----------------------------------------------------------------------------------|-----------------------------------------------------------------------------------|-----|------------------|-----|-----|---------|
| MAA-AA (3:1)     | 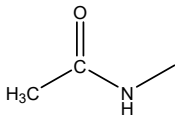 |  | 478 | 494              | 304 | 354 | 281/287 |
| DMI-2-Iml (3:1)  |  |  | 498 | 436 <sup>a</sup> | 281 | 403 | 246/266 |
| TMU-DMU<br>(1:2) |  |  | 448 | 542              | 272 | 375 | 258     |

NA: not available; <sup>a</sup> at 0.4 kPa

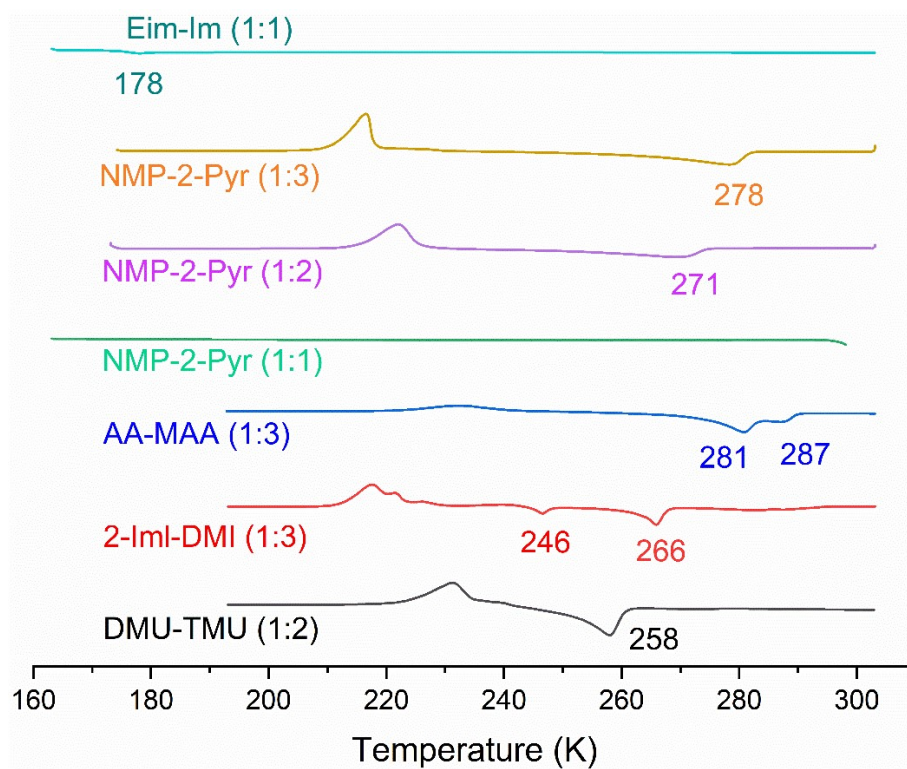

**Fig. S13** DSC curves of seven typical HPLs.

### Measurement of saturated vapor pressure

The saturated vapor pressure of NMP-2-Pyr system was measured by a home-made

equipment. A chamber whose volume is about 40 cm<sup>3</sup> is equipped with a magnetic stirrer to be as equilibrium cell. The temperatures (T) of the chamber is controlled by oil bath with an uncertainty of  $\pm 0.1$  K. The pressure is monitored using a pressure transducer of  $\pm 0.2\%$  uncertainty (in relation to the full scale), which is connected to a Numeric Instrument to record the pressure changes online. In a typical absorption, a known mass (about 1.0 g) of sample was placed into the chamber, and then the air in the chamber was evacuated at room temperature. Equilibrium was thought to be reached when the pressure of the chamber remained constant for 4 hours at 403.2 K.

### **Method of absorption experiments**

The absorption of SO<sub>2</sub> were carried out using well-defined process according to literatures. The whole device consists of two glass chambers whose volumes are 189.9 cm<sup>3</sup> (V<sub>1</sub>) and 40.16 cm<sup>3</sup> (V<sub>2</sub>), respectively. The bigger chamber, named as gas reservoir, isolates gas before it contacts the liquid samples in the smaller chamber. The smaller chamber used as equilibrium cell is equipped with a magnetic stirrer. The temperatures (T) of both chambers are controlled by a water bath with an uncertainty of  $\pm 0.1$  K. The pressures in the two chambers are monitored using two pressure transducers of  $\pm 0.2\%$  uncertainty (in relation to the full scale). The pressure transducers are connected to a Numeric Instrument to record the pressure changes online.

In a typical run, a known mass (w) of pure HPL sample was placed into the equilibrium cell, and the air in the two chambers was evacuated. The pressure in the equilibrium cell was recorded to be P<sub>0</sub>. Desired gas from gas cylinder was then fed into the gas reservoir to a pressure of P<sub>1</sub>. The needle valve between the two chambers was turned on to let the acidic gas be introduced to the equilibrium cell. Absorption

equilibrium was thought to be reached when the pressures of the two chambers remained constant for at least 1 h. The equilibrium pressures were denoted as  $P_2$  for the equilibrium cell and  $P'_1$  for the gas reservoir. The gas partial pressure in the equilibrium cell was  $P_S = P_2 - P_0$ . The acidic gas absorption capacity,  $n(P_S)$ , can thus be calculated using the following equation:

$$n(P_S) = \rho_g(P_1, T)V_1 - \rho_g(P'_1, T)V_1 - \rho_g(P_S, T)(V_2 - \omega/\rho_{HPL}) \quad (S3)$$

where  $\rho_g(P_i, T)$  represents the density of gas in  $\text{mol}\cdot\text{cm}^{-3}$  at  $P_i$  ( $i = 1, S$ ) and  $T$ ;  $\rho_{HPL}$  is the density of HPL in  $\text{g}\cdot\text{cm}^{-3}$  at desired temperature.  $V_1$  and  $V_2$  represent the volumes in  $\text{cm}^3$  of the two chambers, respectively. After determinations,  $\text{SO}_2$  left in the chambers was introduced to an off-gas absorber containing aqueous solution of NaOH in order to prevent  $\text{SO}_2$  leaking into the atmosphere. Duplicate experiments for each sample were performed to obtain the averaged values of gas solubility.

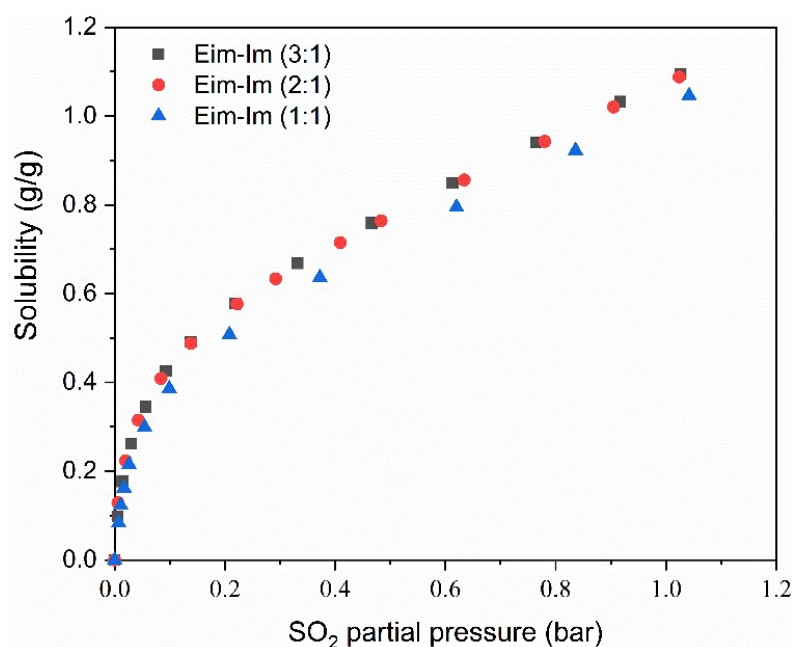

**Fig. S14** The solubility of  $\text{SO}_2$  in Eim-Im system as function of composition at 298.2

K.

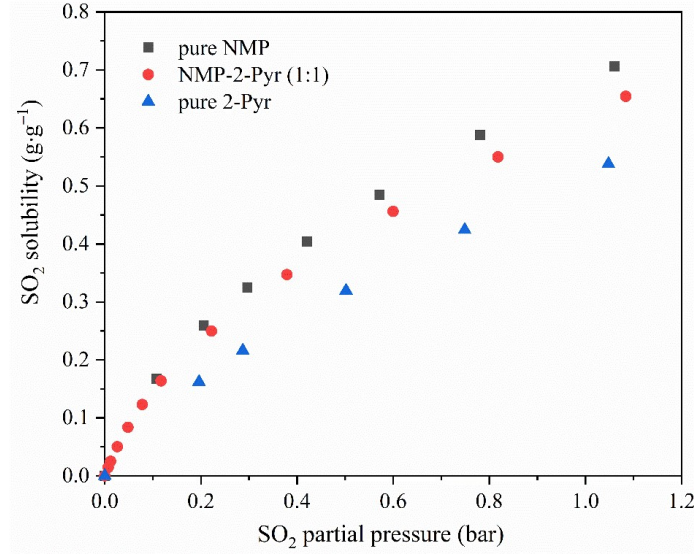

**Fig. S15** The solubility of SO<sub>2</sub> in pure NMP, NMP-2-Pyr (1:1), and pure 2-Pyr at 313.2 K.

### Development of RETM model

Assuming that 1 mole of SO<sub>2</sub> reacts with 1mole of NMP-2-Pyr (1:1), the reaction of SO<sub>2</sub> with the HPL can be given as:

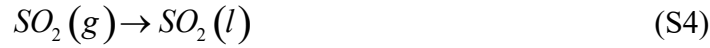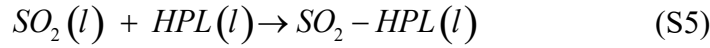

Combining equation (S4) and (S5) leads to the overall reaction Equation (S6).

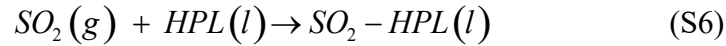

where *g* and *l* represent gas phase and liquid phase, respectively.

The Henry's law for the physical dissolution of SO<sub>2</sub> in dilute solution is defined in molality and given by Equation (S7).

$$P = H\gamma_{SO_2} \frac{m_{SO_2}}{m^\circ} \quad (S7)$$

where *P* represents the SO<sub>2</sub> partial pressure in bar, *H* is the Henry's constant in bar, and *m*<sub>SO<sub>2</sub></sub> is the concentration of free SO<sub>2</sub> in mol·kg<sup>-1</sup>.

The chemical equilibrium of Equation (S5) is expressed into Equation (S8), where  $K_1^\circ$  denotes the equilibrium constant,  $\gamma_{SO_2}$ ,  $\gamma_{HPL}$ , and  $\gamma_{SO_2-HPL}$  represent the activity coefficients of the physically dissolved  $SO_2$ , free HPL and  $SO_2$ -HPL complex in the HPL phase, respectively.  $m_{HPL}$  and  $m_{SO_2-HPL}$  are the concentrations of the HPL and the  $SO_2$ -HPL complex in  $\text{mol}\cdot\text{kg}^{-1}$  and  $m^\circ$  is the standard molality ( $1\text{ mol}\cdot\text{kg}^{-1}$ ). Similarly, the overall reaction equilibrium corresponding to Equation (S6) is formulated using Equation (S9), where  $K^\circ$  is the equilibrium constant of the overall reaction and  $P^\circ$  is the standard pressure (1.0 bar). Equation (S10) denotes the material conservation of the HPL, where  $m_{HPL_0}$  is the initial concentration of NMP-2-Pyr (1:1) that can be calculated from Equation (S11).  $M_{HPL}$  is the molecular weight of the HPL in  $\text{g}\cdot\text{mol}^{-1}$ . The material conservation of  $SO_2$  can be calculated by Equation (S12), where  $m_t$  is the total concentration of  $SO_2$  in the HPL phase in the unit of  $\text{mol}\cdot\text{kg}^{-1}$ .

$$K_1^\circ = \frac{\gamma_{SO_2-HPLs} \frac{m_{SO_2-HPLs}}{m^\circ}}{\gamma_{SO_2} \frac{m_{SO_2}}{m^\circ} \gamma_{HPLs} \frac{m_{HPLs}}{m^\circ}} \quad (\text{S8})$$

$$K^\circ = \frac{\gamma_{SO_2-HPLs} \frac{m_{SO_2-HPLs}}{m^\circ}}{\frac{P}{P^\circ} \gamma_{HPLs} \frac{m_{HPLs}}{m^\circ}} \quad (\text{S9})$$

$$m_{HPL_0} = m_{HPL} + m_{SO_2-HPLs} \quad (\text{S10})$$

$$m_{HPL_0} = \frac{1000}{M_{HPL}} \quad (\text{S11})$$

$$m_t = m_{SO_2} + m_{SO_2-HPLs} \quad (\text{S12})$$

Combining Equation (S7), (S8) and (S9) results in Equation (S13):

$$K^\circ = \frac{K_1^\circ}{H} P^\circ \quad (\text{S13})$$

The activity coefficients of these species can hardly be calculated because of the absence of relevant thermodynamics parameters. They will be normalized in ideal diluted solution in the presence of low-concentration free SO<sub>2</sub>. Therefore, it should be assumed that the product of three activity coefficients in Equations (S8) and (S9) is constant during the whole absorption process to simplify the equilibrium system. After deduction, equation (S14) is achieved to relate the total SO<sub>2</sub> solubility.

$$m_t = \left( \frac{m_{HPL_0}}{P + \frac{H}{K_1^\circ}} + \frac{1}{H} \right) P \quad (\text{S14})$$

The enthalpy change of SO<sub>2</sub> absorption,  $\Delta H$ , can be calculated using the Van't Hoff equation,

$$\frac{d \ln K_1^\circ}{d(1/T)} = -\frac{\Delta H}{R} \quad (\text{S15})$$

**Table S2.** Fitting parameters of RETM for NMP-2-Pyr (1:1) + SO<sub>2</sub> system.

| Temperature (K) | $H$ / bar       | $K_1^\circ$ / kg·mol <sup>-1</sup> | R <sup>2</sup> |
|-----------------|-----------------|------------------------------------|----------------|
| 298.2           | 0.1120 ± 0.0002 | 1.0495 ± 0.0093                    | 0.9999         |
| 313.2           | 0.1918 ± 0.0011 | 0.9156 ± 0.0182                    | 0.9999         |
| 323.2           | 0.2715 ± 0.0032 | 0.6965 ± 0.0214                    | 0.9997         |
| 333.2           | 0.3748 ± 0.0065 | 0.6615 ± 0.0260                    | 0.9997         |

**Table S3.** Fitting parameters of RETM for Eim-Im (1:1) + SO<sub>2</sub> system.

| Temperature (K) | $H$ / bar       | $K_1^\circ$ / kg·mol <sup>-1</sup> | R <sup>2</sup> |
|-----------------|-----------------|------------------------------------|----------------|
| 298.2           | 0.0996 ± 0.0009 | 4.0540 ± 0.3028                    | 0.9989         |

|       |                     |                     |        |
|-------|---------------------|---------------------|--------|
| 313.2 | $0.1643 \pm 0.0045$ | $3.5277 \pm 0.0387$ | 0.9962 |
| 323.2 | $0.2349 \pm 0.0127$ | $3.0061 \pm 0.5117$ | 0.9906 |
| 333.2 | $0.3374 \pm 0.0291$ | $2.7839 \pm 0.5813$ | 0.9822 |

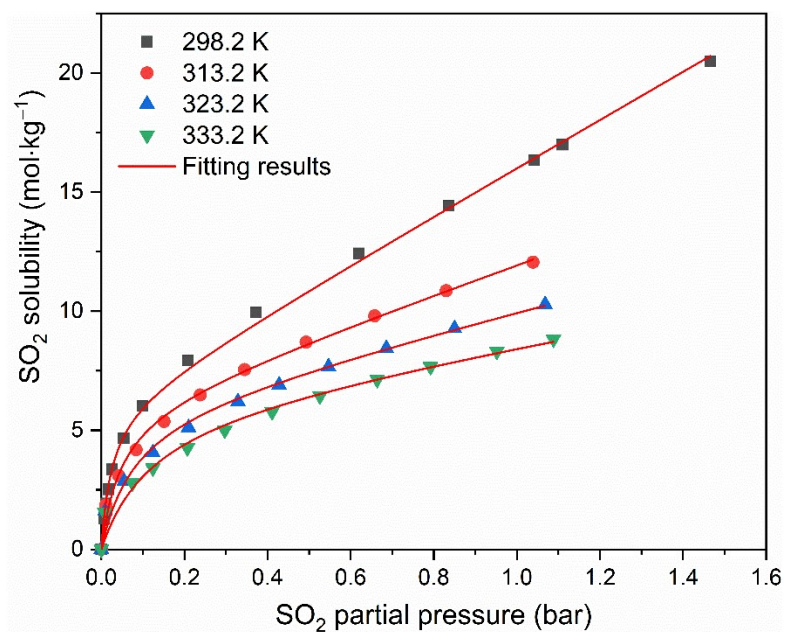

**Fig. S16** Temperature dependence of SO<sub>2</sub> solubility in Eim-Im (1:1).

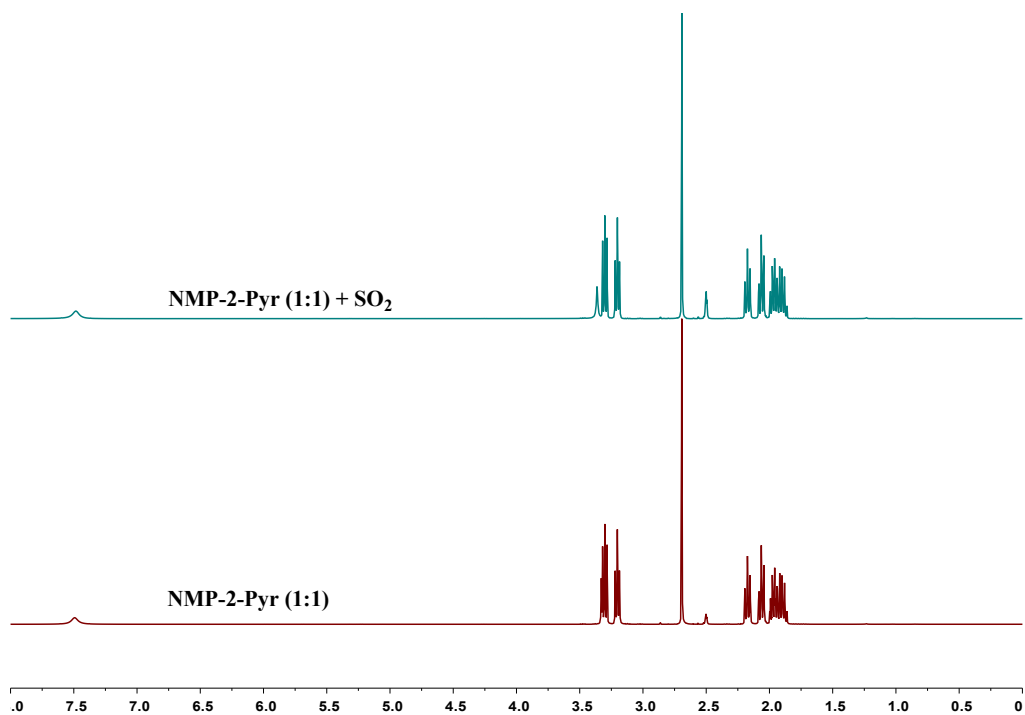

**Fig. S17** <sup>1</sup>H NMR of NMP-2-Pyr (1:1) after and before SO<sub>2</sub> dissolution.

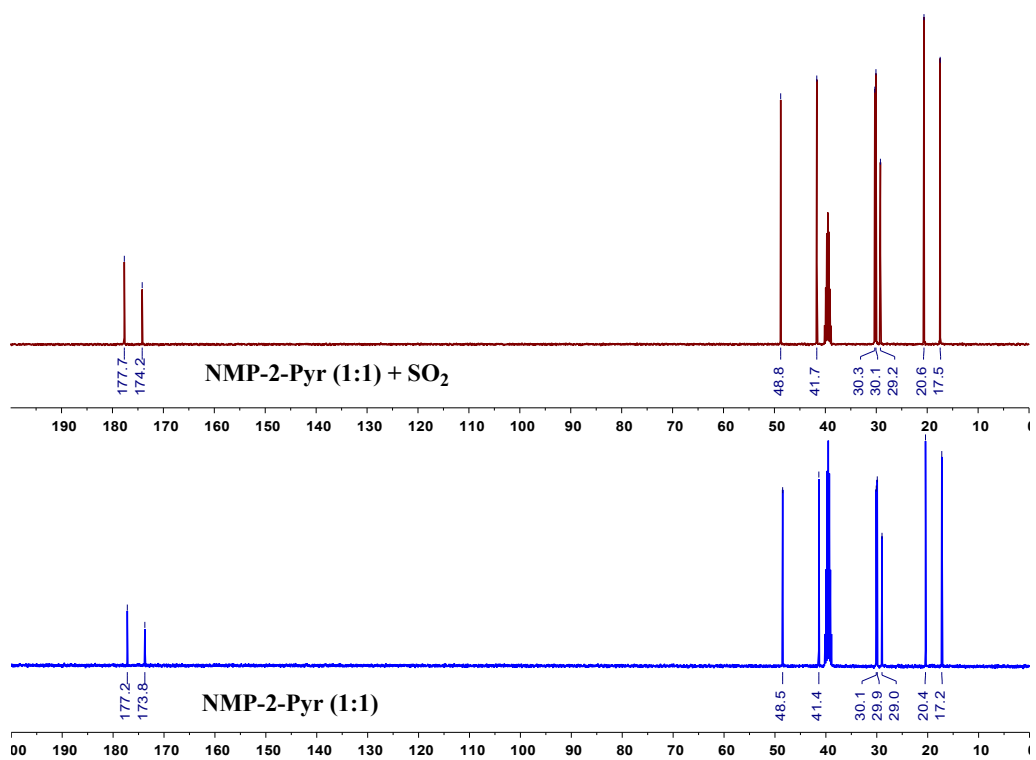

**Fig. S18** <sup>13</sup>C NMR of NMP-2-Pyr (1:1) after and before SO<sub>2</sub> dissolution.



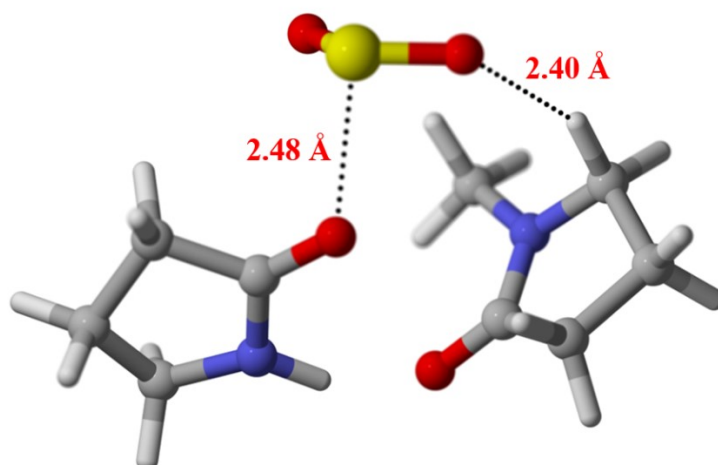

**Fig. S19** Optimized structure of NMP-2-Pyr (1:1) + SO<sub>2</sub> obtained by B3LYP/6-311g (d, p).

### **The SO<sub>2</sub> absorption mechanism by Eim-Im (1:1)**

We have carried out the NMR and FT-IR before and after SO<sub>2</sub> absorption of Eim-Im (1:1). As is shown in Fig. R6, the new peak at 525 cm<sup>-1</sup> can be assigned to the scissor bending vibration ( $\delta$ ) of dissolved SO<sub>2</sub>. In addition, the peaks between 1000 and 1150 cm<sup>-1</sup> widen significantly and the peaks at 1138 and 1168 cm<sup>-1</sup> are combined into one at 1146 cm<sup>-1</sup> after SO<sub>2</sub> absorption. The above changes of peaks can be attributed to the appearance of S=O bond.<sup>1-3</sup> Additionally, the peaks at 1354 and 1393 cm<sup>-1</sup> disappear after SO<sub>2</sub> capture. All the above evidence illustrates the chemical interaction of SO<sub>2</sub> with Eim-Im (1:1).

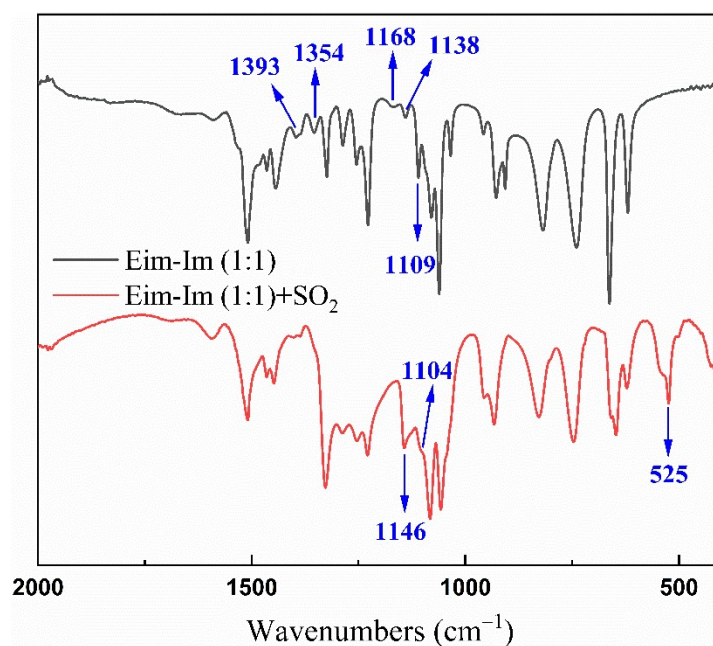

**Fig. S20** FT-IR of Eim-Im (1:1) before and after the absorption of SO<sub>2</sub>.

Fig. R7-R8 show the NMR spectra of Eim-Im (1:1) before and after SO<sub>2</sub> capture. The chemical shifts of the H atoms connected to C(1) and C(2) on Im move upfield from 7.35 and 7.91 ppm to 7.26 and 8.00 ppm, respectively. Simultaneously, the chemical shifts of the C(1) and C(2) atoms on Im rise upfield from 122.2 and 135.8 ppm to 120.8 and 134.5 ppm, respectively. <sup>1</sup>H NMR and <sup>13</sup>C NMR demonstrate the direct interaction between Im and SO<sub>2</sub>. For Eim, the chemical shifts of the H atoms connected to C(3), C(4), and C(5) on Eim move from 8.08, 7.24, and 7.38 ppm to 8.16, 7.11, and 7.27 ppm, respectively. Meanwhile, the chemical shifts of C(3), C(4), and C(5) atoms on Eim change upfield from 137.1, 128.7, and 119.3 ppm to 135.9, 125.9, and 119.8 ppm, respectively. <sup>1</sup>H NMR and <sup>13</sup>C NMR also demonstrate the direct interaction between Eim and SO<sub>2</sub>. Consequently, it is concluded that there exists acid-base chemical interaction between SO<sub>2</sub> and Im as well as SO<sub>2</sub> and Eim based on the characterization data. Thus, the absorption mechanism of SO<sub>2</sub> by Eim-Im (1:1) is proposed in Scheme S1.

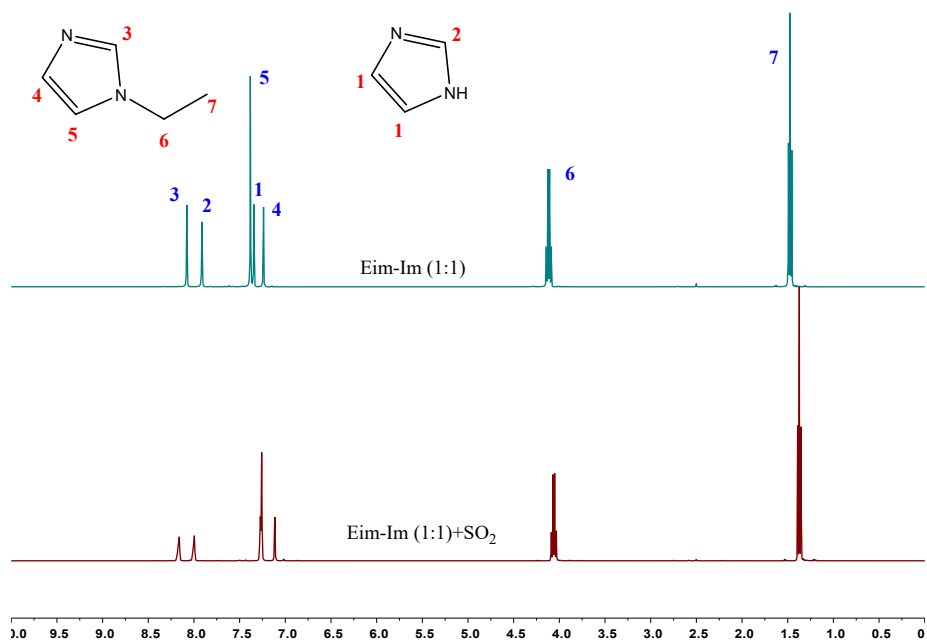

**Fig. S21**  $^1\text{H}$  NMR of Eim-Im (1:1) before and after the absorption of  $\text{SO}_2$ .

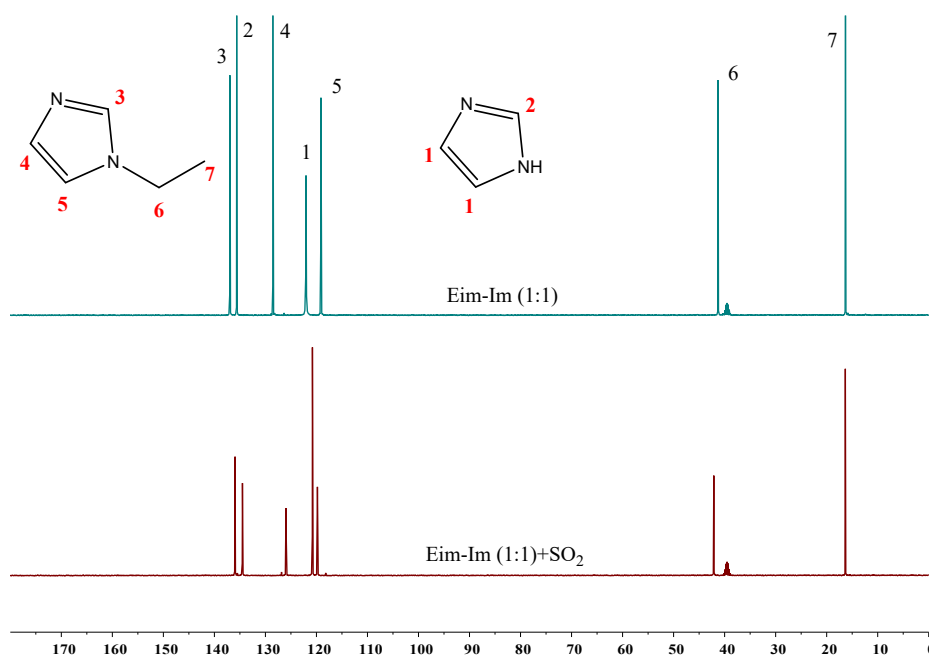

**Fig. S22**  $^{13}\text{C}$  NMR of Eim-Im (1:1) before and after the absorption of  $\text{SO}_2$ .

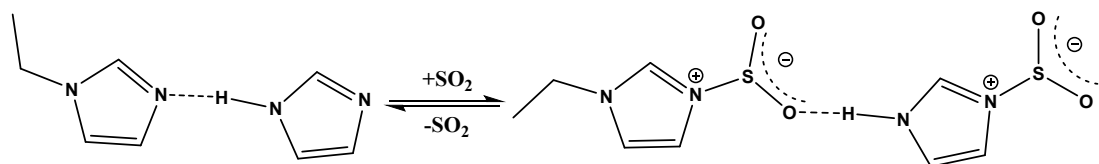

**Scheme S1.** The proposed absorption mechanism between Eim-Im (1:1) and  $\text{SO}_2$ .

### Regeneration of Eim-Im (1:1)

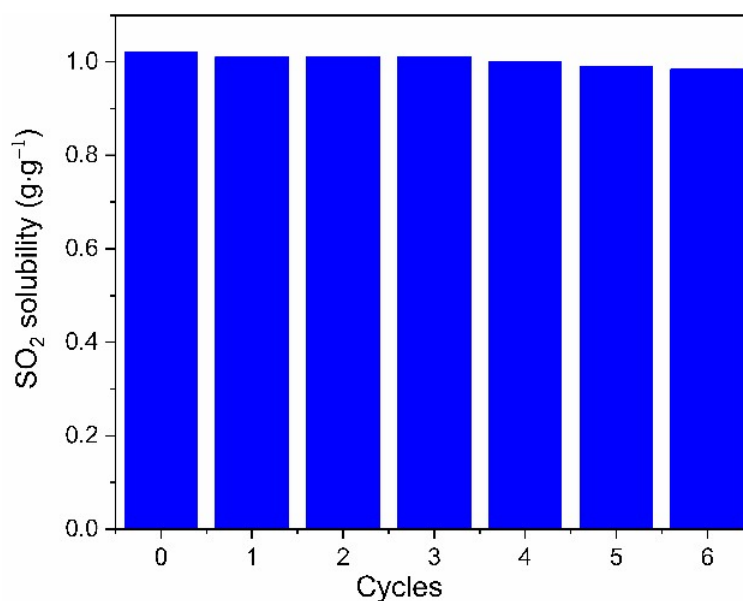

**Fig. S23** Regeneration performance of Eim-Im (1:1) during SO<sub>2</sub> absorption/desorption cycles. Absorption: 298.2 K and 1.0 bar; Desorption: 333.2 K and 0.01 bar for 1.0 h.

The absorption capacity of SO<sub>2</sub> of Eim-Im (1:1) in six cycles is 1.02, 1.00, 1.00, 1.00, 0.993, 0.985, and 0.980 g·g<sup>-1</sup>, respectively. To figure out the reason for the loss of absorption, a certain amount of Eim-Im (1:1) (about 1.61 g) was taken for the weight loss experiment under desorption conditions (333.2 K and 0.01 bar for 1.0 h), and the mass loss is only about 0.17%. However, the absorption capacity of the first cycle was 98 % of that of fresh DES in the regeneration experiment. Thus the slight loss of SO<sub>2</sub> capacity should be attributed to the strong chemical interaction between SO<sub>2</sub> and Eim-Im (1:1), resulting in the incomplete release of SO<sub>2</sub> during desorption, rather than the volatilization of Eim-Im (1:1).

**Table S4.** A summary of CO<sub>2</sub> and N<sub>2</sub> solubilities in HPLs at 313.2 K and 1.0 bar.

| HPLs            | CO <sub>2</sub> (g·g <sup>-1</sup> ) | N <sub>2</sub> (*10 <sup>-4</sup> g·g <sup>-1</sup> ) |
|-----------------|--------------------------------------|-------------------------------------------------------|
| NMP-2-Pyr (1:1) | 0.0196                               | 2.93                                                  |
| Eim-Im (1:1)    | 0.0175                               | 1.47                                                  |
| DMU-TMU (1:2)   | 0.0200                               |                                                       |

|                 |        |
|-----------------|--------|
| AA-MAA (1:3)    | 0.0144 |
| 2-ImI-DMI (1:3) | 0.0167 |

### The calculation of ideal selectivities

$$S_{SO_2/CO_2} = \frac{W_{SO_2}}{W_{CO_2}} \quad (2)$$

$$S_{SO_2/N_2} = \frac{W_{SO_2}}{W_{N_2}} \quad (3)$$

where  $W_{SO_2}$ ,  $W_{CO_2}$ , and  $W_{N_2}$  denote the absorption capacities of  $SO_2$ ,  $CO_2$ , and  $N_2$  in the unit of  $g \cdot g^{-1}$  at 313.2 K and 1.0 bar, respectively.  $S_{SO_2/CO_2}$  and  $S_{SO_2/N_2}$  are utilized to estimate the ability of these HPLs for selectively separating of  $SO_2$  from  $CO_2$  and  $N_2$ , respectively.

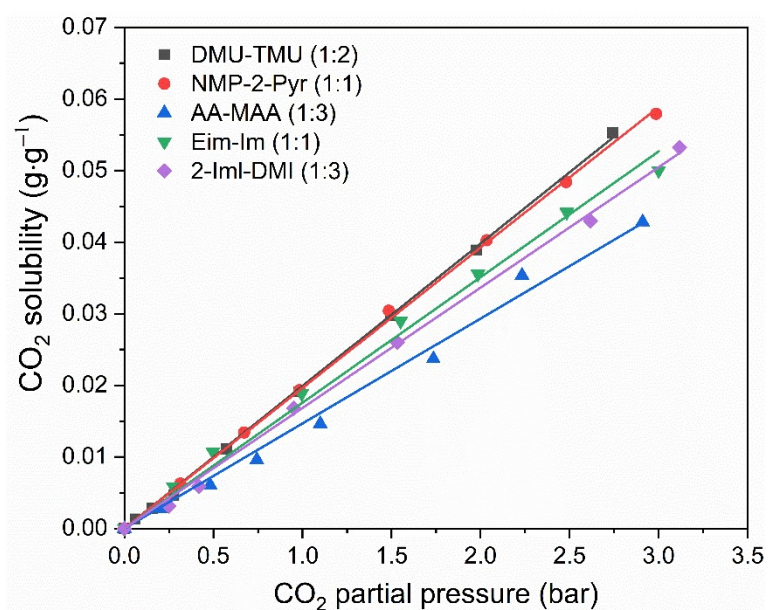

**Figure S24.**  $CO_2$  solubility as a function of pressure in five HPLs at 313.2 K.

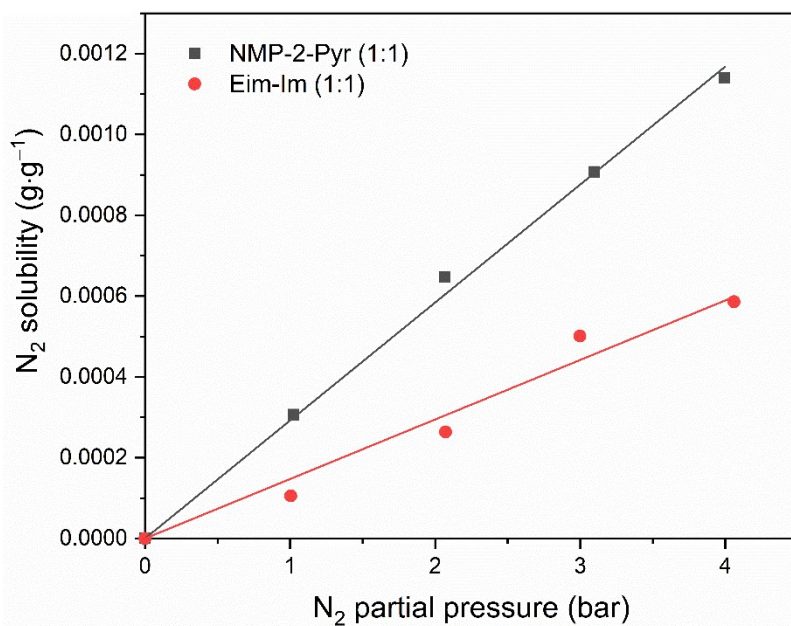

**Figure S25.** N<sub>2</sub> solubility as a function of pressure in NMP-2-Pyr (1:1) and Eim-Im (1:1) at 313.2 K.

**Table S5.** Comparison of HPLs with DESs, ILs, and conventional organic solvents in the absorption of SO<sub>2</sub>.

| DESs                              | Temperature (K) | Viscosity (mPa·s)  | SO <sub>2</sub> solubility at 1.0 bar (g·g <sup>-1</sup> ) | References |
|-----------------------------------|-----------------|--------------------|------------------------------------------------------------|------------|
| NMP-2-Pyr (1:1)                   | 298.2 (313.2)   | 4.71 (3.42)        | 0.89 (0.63)                                                | This work  |
| Eim-Im (1:1)                      | 298.2 (313.2)   | 5.45 (3.66)        | 1.02 (0.77)                                                | This work  |
| ChCl-Glycerol (1:2)               | 313.2           | ~100               | 0.26                                                       | 4          |
| TEAC-Levulinic acid (1:3)         | 313.2           | NA                 | 0.36                                                       | 5          |
| Acetamide-KSCN (3:1)              | 313.2           | 20.3               | 0.37                                                       | 6          |
| EmimCl-NFM (1:1)                  | 313.2           | 79.4               | 0.16 <sup>a</sup>                                          | 7          |
| Betaine-EG (1:3)                  | 313.2           | NA                 | 0.37 <sup>b</sup>                                          | 8          |
| Ethylenurea-BMIMCl (1:2)          | 303.2           | 375.9              | 0.95                                                       | 9          |
| Caprolactam-Acetamide (1:1)       | 313.2           | 66.5 <sup>c</sup>  | 0.62                                                       | 10         |
| ChCl-Guaiacol (1:3)               | 313.2           | ~140               | ~0.3                                                       | 11         |
| BmimCl-Imidazole (1:1)            | 293.2           | 345.3 <sup>d</sup> | 1.29                                                       | 12         |
| [N <sub>2222</sub> ][Cl]-EG (1:2) | 293.2           | NA                 | 0.79                                                       | 13         |
| [Bmim][BF <sub>4</sub> ]          | 313.2           | 48.9 <sup>14</sup> | 0.23                                                       | 5          |
| [Bmim][Ac]                        | 298.2           | 133 <sup>e</sup>   | 0.62                                                       | 15         |
| [N <sub>2224</sub> ][dimaleate]   | 313.2           | 273 <sup>f</sup>   | 0.41                                                       | 16         |

|                               |       |                   |                   |    |
|-------------------------------|-------|-------------------|-------------------|----|
| [TMG][Lac]                    | 313.2 | NA                | 0.31              | 17 |
| [C <sub>4</sub> Py][SCN]      | 313.2 | 42.0              | 0.65              | 5  |
| [P <sub>66614</sub> ][Tetz]   | 293.2 | NA                | 0.43              | 18 |
| TEACl-Im (1:3)                | 293.2 | 139               | 1.25              | 19 |
| Methanol                      | 298.2 | 0.45 <sup>b</sup> | 0.59              | 20 |
| Acetone                       | 298.2 | 0.27 <sup>b</sup> | 0.87              | 20 |
| Ethyl acetate                 | 298.2 | 0.36 <sup>b</sup> | 0.52              | 20 |
| NDI                           | 313.2 | 13.3              | 0.38              | 21 |
| Sulfolane                     | 313.2 | 7.30 <sup>b</sup> | 0.29              | 22 |
| Ethylene glycol               | 313.2 | 25.7 <sup>g</sup> | 0.14              | 22 |
| Propylene carbonate           | 313.2 | 2.5 <sup>h</sup>  | 0.25              | 22 |
| Tetraethylene glycol dimethyl | 313.2 | 2.32 <sup>b</sup> | 0.36 <sup>i</sup> | 23 |

<sup>a</sup> 10000 ppm; <sup>b</sup> from Chemical Properties Handbook; <sup>c</sup> at 303.2 K; <sup>d</sup> at 298.2 K; <sup>e</sup> at 313.2 K; <sup>f</sup> at 298.2 K; <sup>g</sup> at 289.2 K; <sup>h</sup> at 298.2 K.; <sup>i</sup> 0.925 bar; NA: not available.

## References

1. D. S. Deng, X. B. Liu and B. Gao, *Ind. Eng. Chem. Res.*, 2017, **56**, 13850-13856.
2. P. Zhang, W. Xiong, M. Shi, Z. Tu, X. Hu, X. Zhang, and Y. Wu, *Chem. Eng. J.*, 2022, **438**, 135626.
3. Z. Li, L. Zhou, Y. Wei, H. Peng, and K. Huang, *Ind. Eng. Chem. Res.* 2020, **59**, 13696–13705.
4. D. Z. Yang, M. Q. Hou, H. Ning, J. L. Zhang, J. Ma, G. Y. Yang and B. X. Han, *Green Chem.*, 2013, **15**, 2261-2265.
5. D. S. Deng, G. Q. Han and Y. T. Jiang, *New J. Chem.*, 2015, **39**, 8158-8164.
6. B. Liu, F. Wei, J. Zhao and Y. Wang, *RSC Adv.*, 2013, **3**, 2470-2476.
7. D. Deng, C. Zhang, X. Deng and L. Gong, *Energy Fuels*, 2020, **34**, 665-671.
8. K. Zhang, S. H. Ren, Y. C. Hou and W. Z. Wu, *J. Hazard. Mater.*, 2017, **324**, 457-463.
9. B. Jiang, H. M. Zhang, L. H. Zhang, N. Zhang, Z. H. Huang, Y. Chen, Y. L. Sun and X. W. Tantai, *ACS Sustainable Chem. Eng.*, 2019, **7**, 8347-8357.
10. B. Y. Liu, J. J. Zhao and F. X. Wei, *J. Mol. Liq.*, 2013, **180**, 19-25.

11. X. B. Liu, B. Gao and D. S. Deng, *Sep. Sci. Technol.*, 2018, **53**, 2150-2158.
12. Y. Chen, B. Jiang, H. Z. Dou, L. H. Zhang, X. W. Tantai, Y. L. Sun and H. M. Zhang, *Energy Fuel.*, 2018, **32**, 10737-10744.
13. G. Cui, D. Yang and H. Qi, *Ind. Eng. Chem. Res.*, 2021, **60**, 4536-4541.
14. X. Zhang, Z. Tu, H. Li, K. Huang, X. Hu, Y. Wu and D. R. MacFarlane, *J. Membrane Sci.*, 2017, **543**, 282-287.
15. M. B. Shiflett and A. Yokozeki, *Ind. Eng. Chem. Res.*, 2010, **49**, 1370-1377.
16. K. Huang, G.-N. Wang, Y. Dai, Y.-T. Wu, X.-B. Hu and Z.-B. Zhang, *RSC Adv.*, 2013, **3**, 16264-16269.
17. W. Wu, B. Han, H. Gao, Z. Liu, T. Jiang and J. Huang, *Angew. Chem. Int. Ed.*, 2004, **43**, 2415-2417.
18. C. Wang, G. Cui, X. Luo, Y. Xu, H. Li and S. Dai, *J. Am. Chem. Soc.*, 2011, **133**, 11916-11919.
19. P. Zhang, G. Xu, M. Shi, Z. Wang, Z. Tu, X. Hu, X. Zhang and Y. Wu, *Sep. Purif. Technol.*, 2022, **286**, 120489.
20. W. Hayduk and H. Pahlevanweh, *Can. J. Chem. Eng.*, 1987, **65**, 299-307.
21. K. Huang, Y.-L. Chen, X.-M. Zhang, S.-L. Ma, Y.-T. Wu and X.-B. Hu, *Fluid Phase Equilibr.*, 2014, **378**, 21-33.
22. K. Huang, S. Xia, X.-M. Zhang, Y.-L. Chen, Y.-T. Wu and X.-B. Hu, *J. Chem. Eng. Data*, 2014, **59**, 1202-1212.
23. K. A. G. Schmidtt and A. E. Mather, *Can. J. Chem. Eng.*, 2001, **79**, 946-960.
